# Supplementary material for: Synthesis and solution self-assembly of block copolymers with a gradient, crystallizable polyferrocenylsilane core-forming metalloblock
Source: Royal Society of Chemistry journal article supplement (doi:10.1039/c3sm50859e), 2013-01-01
Supplement: c3sm50859e.pdf [file c3sm50859e.pdf]

## Supporting Information

# Synthesis and Solution Self-Assembly of Block Copolymers with a Gradient, Crystallizable Polyferrocenylsilane Core-Forming Metalloblock

Felix H. Schacher,<sup>a,b,†</sup> Vasilios Bellas,<sup>a,†</sup> Mitchell A. Winnik<sup>\*c</sup> and Ian Manners<sup>\*a</sup>

<sup>a</sup> School of Chemistry, University of Bristol, Cantock's Close, Bristol BS8 1TS, United Kingdom. E-mail: [ian.manners@bristol.ac.uk](mailto:ian.manners@bristol.ac.uk)

<sup>b</sup> Present address: Institute of Organic and Macromolecular Chemistry and Jena Center for Soft Matter (JCSM), Friedrich-Schiller-University Jena, Lessingstraße 8, D-07743 Jena, Germany

<sup>c</sup> Department of Chemistry, University of Toronto, 80 St. George Street, Toronto, Ontario M5S 3H6, Canada.

E-mail: [m.winnik@chem.utoronto.ca](mailto:m.winnik@chem.utoronto.ca)

† F. H. S. and V. B. contributed equally to this work.

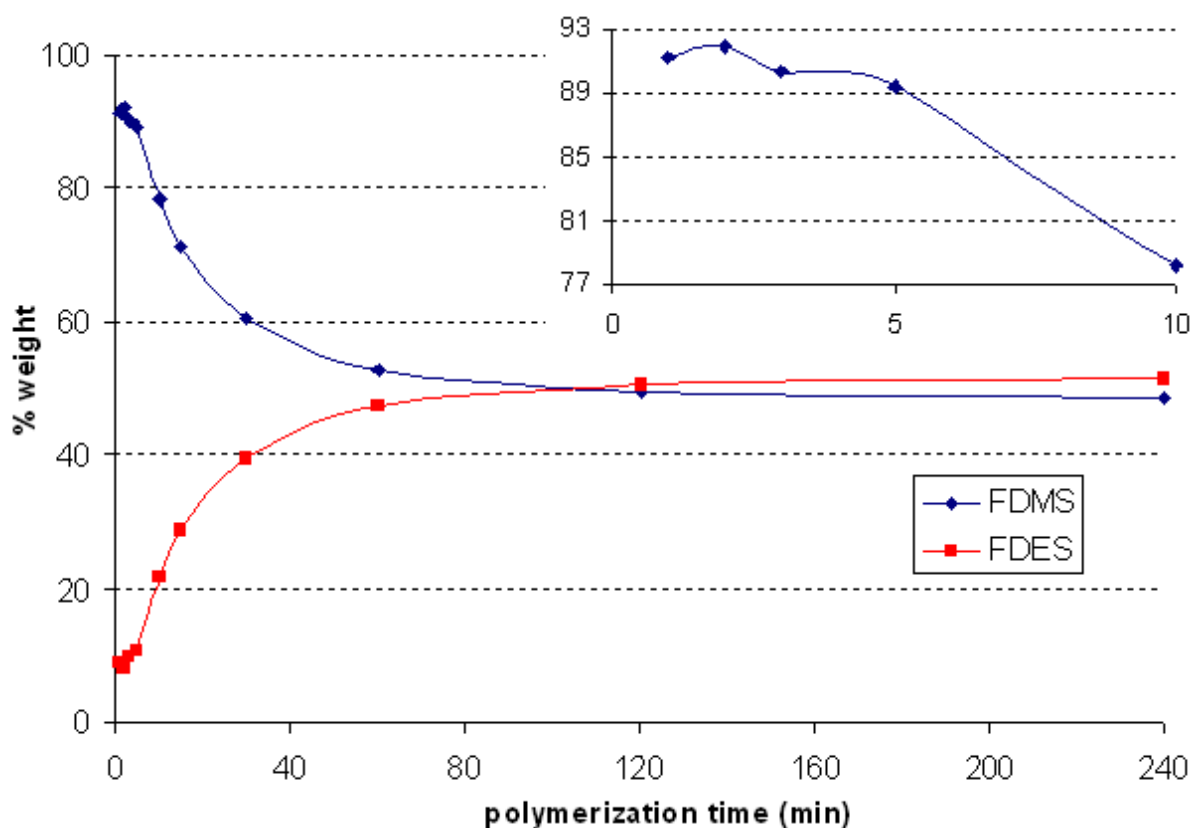

**Fig. S1** Monomer weight percentage in the gradient copolymer through the course of polymerization (see Table 2).

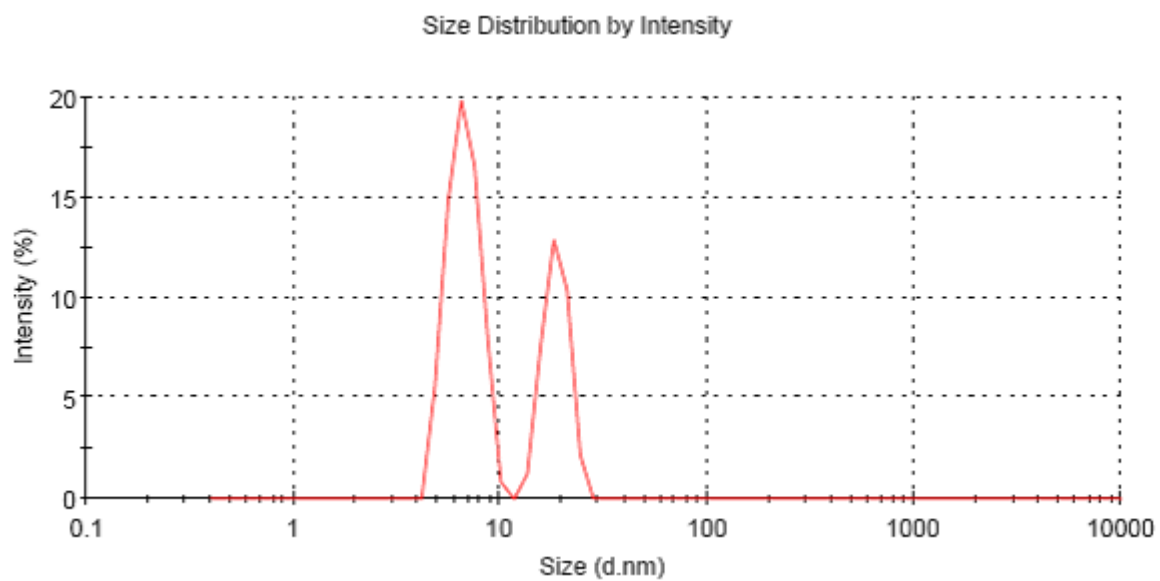

**Fig. S2** DLS data for  $PI_{387}\text{-}b\text{-(PFDMS}_{22}\text{-grad-PFDES}_{17})_{39}$  micelles described in Figure 4A.
